# Supplementary material
Source: MDPI journal article supplement (https://www.mdpi.com/search?q=ijerph-17-00483)
Supplement: s001 [file ijerph-17-00483-s001.pdf]

**Table S1.** Chemical structures and groups of eighteen PAHs

| PAHs species           | Abbreviation | Chemical structures             | Molecular weight | Rings |
|------------------------|--------------|---------------------------------|------------------|-------|
| Naphthalene            | Nap          | C <sub>10</sub> H <sub>8</sub>  | 128              | 2     |
| Acenaphthylene         | Acy          | C <sub>12</sub> H <sub>8</sub>  | 152              | 3     |
| Acenaphthene           | Ace          | C <sub>12</sub> H <sub>10</sub> | 154              | 3     |
| Fluorene               | Flu          | C <sub>13</sub> H <sub>10</sub> | 166              | 3     |
| Phenanthrene           | Phe          | C <sub>14</sub> H <sub>10</sub> | 178              | 3     |
| Anthracene             | Ant          | C <sub>14</sub> H <sub>10</sub> | 178              | 3     |
| Fluoranthene           | Fln          | C <sub>16</sub> H <sub>10</sub> | 202              | 4     |
| Pyrene                 | Pyr          | C <sub>16</sub> H <sub>10</sub> | 202              | 4     |
| Chrysene               | Chr          | C <sub>18</sub> H <sub>12</sub> | 228              | 4     |
| Benz[a]anthracene      | BaA          | C <sub>18</sub> H <sub>12</sub> | 228              | 4     |
| Benz[b]fluoranthene    | BbF          | C <sub>20</sub> H <sub>12</sub> | 252              | 5     |
| Benz[k]fluoranthene    | BkF          | C <sub>20</sub> H <sub>12</sub> | 252              | 5     |
| Benzo[j]fluoranthene   | BjF          | C <sub>20</sub> H <sub>12</sub> | 252              | 5     |
| Benzo[a]pyrene         | BaP          | C <sub>20</sub> H <sub>12</sub> | 252              | 5     |
| Benzo[e]pyrene         | BeP          | C <sub>20</sub> H <sub>12</sub> | 252              | 5     |
| Indeno[1,2,3-cd]pyrene | InD          | C <sub>22</sub> H <sub>12</sub> | 276              | 6     |
| Benzo[g,h,i]-perylene  | BghiP        | C <sub>22</sub> H <sub>12</sub> | 276              | 6     |
| Dibenzo[a,h]anthracene | DbA          | C <sub>22</sub> H <sub>14</sub> | 278              | 6     |

**Table S2.** Mann-Whitney U test of PM<sub>2.5</sub>,  $\sum_{18}$ PAHs and BaP in non-heating and heating periods

| Variables             | Non-heating period | Heating period | <i>p</i> value |
|-----------------------|--------------------|----------------|----------------|
| PM <sub>2.5</sub>     | 79 (115)           | 106 (175)      | 0.091          |
| $\sum_{18}$ PAHs      | 185 (126)          | 282 (193)      | 0.003          |
| BaP                   | 3.64 (6.20)        | 60.4 (31.5)    | < 0.001        |
| Temperature (°C)      | 4.95 (12.4)        | -1.25 (3.55)   | 0.023          |
| Relative humidity (%) | 66 (29.5)          | 66 (35.5)      | 0.862          |
| Wind speed (m/s)      | 7.5 (2.75)         | 6.95 (4.33)    | 0.659          |

*p* < 0.05 for statistical difference.

**Table S3.** Spearman correlation of  $\sum_{18}$ PAHs and meteorological factors in sampling periods

| Variables             | Temperature | Relative humidity (%) | Wind speed | $\sum_{18}$ PAHs |
|-----------------------|-------------|-----------------------|------------|------------------|
| Temperature           | 1           | -0.033                | -0.015     | -0.428**         |
| Relative humidity (%) |             | 1                     | -0.695**   | 0.255            |
| wind speed            |             |                       | 1          | 0.113            |
| $\sum_{18}$ PAHs      |             |                       |            | 1                |

\*\* Correlation is significant at the 0.01 level (two-tailed)

**Table S4.** Diagnostic ratios of PM<sub>2.5</sub>-bound PAHs and their corresponding values in present study

| Diagnostic ratio | Non-heating period | Heating period | Ratio range                 | Sources                                                                             | References |
|------------------|--------------------|----------------|-----------------------------|-------------------------------------------------------------------------------------|------------|
| Ant/(Ant+Phe)    | 0.28               | 0.43           | < 0.1<br>> 0.1              | Petroleum<br>Combustion                                                             | [49]       |
| Flu/(Flu+Pyr)    | 0.55               | 0.59           | < 0.4<br>0.4-0.5<br>> 0.5   | Petroleum input<br>Liquid fossil fuel combustion<br>Grass, wood and coal combustion | [49,50]    |
| BaA/(BaA+Chr)    | 0.58               | 0.57           | > 0.35<br>0.2-0.35<br>< 0.2 | Petroleum combustion<br>Grass, wood and coal combustion<br>Petroleum                | [6,49]     |
| InD/(InD+BghiP)  | 0.21               | 0.15           | < 0.2<br>0.2-0.5<br>> 0.5   | Petroleum sources<br>Petroleum combustion<br>Grass, wood and coal combustion        | [6]        |

**Table S5.** Average BaP<sub>eq</sub> concentrations of PM<sub>2.5</sub>-bound PAHs (ng/m<sup>3</sup>)

| PAHs species          | Toxic equivalency factor (TEF) | BaP <sub>eq</sub> concentration (ng/m <sup>3</sup> ) |                       |
|-----------------------|--------------------------------|------------------------------------------------------|-----------------------|
|                       |                                | Non-heating period                                   | Heating period        |
| Nap                   | 0.001                          | 0.014                                                | 0.033                 |
| Acy                   | 0.001                          | 0.024                                                | 0.043                 |
| Ace                   | 0.001                          | 0.006                                                | 0.012                 |
| Flu                   | 0.001                          | 0.001                                                | 0.003                 |
| Phe                   | 0.001                          | 0.005                                                | 0.005                 |
| Ant                   | 0.01                           | 0.045                                                | 0.035                 |
| Fln                   | 0.001                          | 0.005                                                | 0.017                 |
| Pyr                   | 0.001                          | 0.004                                                | 0.012                 |
| Chr                   | 0.01                           | 0.021                                                | 0.076                 |
| BaA                   | 0.1                            | 0.316                                                | 0.985                 |
| BbF                   | 0.1                            | 0.683                                                | 2.667                 |
| BkF                   | 0.1                            | 2.548                                                | 1.655                 |
| BjF                   | 0.1                            | 1.286                                                | 3.383                 |
| BaP                   | 1                              | 18.900                                               | 61.560                |
| BeP                   | 0.01                           | 0.227                                                | 0.069                 |
| DbA                   | 1                              | 0.810                                                | 0.375                 |
| BghiP                 | 0.01                           | 0.517                                                | 0.239                 |
| InD                   | 0.1                            | 1.797                                                | 0.205                 |
| Total                 |                                | 27.2                                                 | 71.4                  |
| BaP/Total (%)         |                                | 69.5                                                 | 85.3                  |
| Carcinogenicity index |                                | 2.99×10 <sup>-5</sup>                                | 7.85×10 <sup>-5</sup> |
